# Supplementary material
Source: HighWire-hosted journal article supplement (https://www.annfammed.org/highwire/filestream/7839/field_highwire_adjunct_files/0/Wilkinson_App.pdf)
Supplement: Wilkinson_App.pdf [file Wilkinson_App.pdf]

**Online Supplementary Material**

Wilkinson JE, Deis CE, Bowen DJ, Bokhour BG. 'It's easier said than done': perspectives on mammography for women with intellectual disabilities. *Ann Fam Med*. 2011;9(2):142-147.

<http://www.annfammed.org/cgi/content/full/9/2/142/DC1>

---

**Supplemental Appendix 1. Interview Guide**

---

1. Tell me about yourself.
  - a. Who do you live with?
  - b. Do you work? Take me through a typical day. What is your day like?
  - c. Tell me what kinds of things you need help doing on a typical day.
  - d. Who helps you with those things?
  - e. Tell me about that person. How does it feel when they help you?
2. Tell me about your doctor.
  - a. What is it like when you go to your regular, primary care doctor?
  - b. How do you feel about the doctor?
  - c. Tell me about when you talk with the doctor. What makes you feel good about your doctor? What makes you feel bad?
  - d. Does anyone usually go with you to the doctor?
  - e. Is it the same person who helps you do other things?
  - f. How does that work? Do you think it would be better or worse without that person there?
3. I'd like to talk to you about when your doctor asks you to get a test. Can you remember a time when that happened?
  - a. What was the test?
  - b. Why was it being done?
  - c. What did your doctor tell you about it?
  - d. What did you think when your doctor told you about the test?
  - e. When you went for the test, was it like you thought it would be?
  - f. Would you do it again? Why or why not?
4. I'd like to talk to you about the test for breast cancer – the mammogram. Can you remember if you ever had one?
  - a. Did your doctor ever talk to you about it?
  - b. What did he/she say?
  - c. Has anyone else (not your doctor) ever talked to you about it?
  - d. Do you know anyone who's had one? What did they say?
  - e. What did you think when you heard about it?
  - f. When you went for the test, was it like you thought it would be?
  - g. Would you do it again? Why or why not?
5. Is there anything else you think I should know?
